# Supplementary material for: Efficient removal of mercury(ii) ions using glutamic acid modified metal–organic frameworks: adsorption models, thermodynamics, and parameter optimization
Source: Royal Society of Chemistry journal article supplement (doi:10.1039/d6ra02574a), 2026-06-05
Supplement: d6ra02574a1.pdf [file d6ra02574a1.pdf]

**Efficient removal of mercury (II) ions using glutamic acid modified metal-organic framework: Adsorption models, thermodynamics, and parameter optimization**

Table S1. chemical name, formula, and company.

| <b>Chemical name</b>     | <b>Formula</b>                                | <b>Company</b>             |
|--------------------------|-----------------------------------------------|----------------------------|
| Silver nitrate           | AgNO <sub>3</sub>                             | Sigma-Aldrich, Germany     |
| Mercuric chloride        | HgCl <sub>2</sub>                             | Sigma-Aldrich, Germany     |
| 2-aminoterephthalic acid | C <sub>8</sub> H <sub>7</sub> NO <sub>4</sub> | Sigma-Aldrich, Germany     |
| Glutamic acid            | C <sub>5</sub> H <sub>9</sub> NO <sub>4</sub> | Sigma-Aldrich, Germany     |
| Sodium hydroxide         | NaOH                                          | LOBA CHEMIE PVT.LTD, India |
| Hydrochloric acid 37%    | HCl                                           | LOBA CHEMIE PVT.LTD, India |
| Ethanol                  | C <sub>2</sub> H <sub>5</sub> OH              | LOBA CHEMIE PVT.LTD, India |
| Methanol                 | CH <sub>3</sub> OH                            | LOBA CHEMIE PVT.LTD, India |

Table S2. Instruments and equipments.

| Test name                        | Abbreviation | Instrument name                                               | Company                                    | Illustration                                                                                                                                                                                                                         |
|----------------------------------|--------------|---------------------------------------------------------------|--------------------------------------------|--------------------------------------------------------------------------------------------------------------------------------------------------------------------------------------------------------------------------------------|
| Fourier transformer infrared     | FT-IR        | A Nicolet IS10 Fourier transform infrared (FTIR) spectrometer | Thermo Fisher Scientific, Waltham, MA, USA | equipped with an attenuated total reflectance accessory and which ran in the 4000-400 $\text{cm}^{-1}$ range was used to gather FTIR spectra                                                                                         |
| Powered X-ray diffraction        | PXRD         | Siemens diffractometer (model D500, Germany)                  | Germany                                    | patterns were captured from powder samples through the use of a Siemens diffractometer (model D500, Germany) that was fitted with a Cu-K radiation source (wavelength 1.54 Angstroms ( $\text{\AA}$ )) operating at 30 kV and 20 mA. |
| Scanning Electron Microscope     | SEM          | (JSM-6510LV, JEOL Ltd., Tokyo, Japan)                         | JEOL Ltd., Tokyo, Japan                    | The morphology of the investigated sorbents was analyzed with the use of a scanning electron microscope                                                                                                                              |
| X-ray photoelectron spectroscopy | XPS          | K-ALPHA (Thermo Fisher Scientific, USA)                       | Thermo Fisher Scientific, USA              | Used for determination the elemental analysis for the compound                                                                                                                                                                       |
| Braunnar Emmet Teller            | BET          | Quantachrome Instruments, Anton Paar                          | Quanta Tec, Inc., Boynton Beach, FL, USA   | was utilised for surface and pore analysis (Brunauer Emmett-Teller (BET) surface area, porous volume, and pore size), and NovaWin Software (v11.0) was used for data interpretation.                                                 |

|                                |                      |                                                                         |                                           |  |                                                                                                                                                                                                            |
|--------------------------------|----------------------|-------------------------------------------------------------------------|-------------------------------------------|--|------------------------------------------------------------------------------------------------------------------------------------------------------------------------------------------------------------|
|                                |                      | USA                                                                     |                                           |  | The BET surface area of material adsorbents was obtained by the application of nitrogen adsorption-desorption isotherms at 77K through the use of a specific analyser (Quadratorb-EVO, Quantachrome, USA). |
| UV-visible spectrophotometer   | UV spectrophotometer | HACH LANGE DR5000                                                       | HACH LANGE<br>Germany                     |  | Measuring the concentration of the adsorbate solution via using Beer Lambert law                                                                                                                           |
| Atomic adsorption spectrometer |                      | PerkinElmer atomic absorption spectrometer (PinAAcle 500),<br>Singapore | PerkinElmer,<br>Singapore                 |  | Measuring the metal concentration                                                                                                                                                                          |
| Energy Dispersive X-ray        | EDX                  | Leo1430VP microscope                                                    | Carl Zeiss AG,<br>Jena, Germany           |  | Elemental analysis of the material                                                                                                                                                                         |
| pH meter                       | pH                   | HANNA (model 211)                                                       | USA                                       |  | Measuring the acidity or basicity of the solution                                                                                                                                                          |
| Sonication                     | Ultrasonic           | Elmasonic P300H ultrasonic bath, continuous mode, power 380 W           | Elma Schmidbauer GmbH, Singen,<br>Germany |  | Sonication of the material as well as used to disperse material on the solution as it decreases the particle size of the material                                                                          |
| Water bath                     | Shaking              | GFL Orbital Shaker 3017                                                 |                                           |  |                                                                                                                                                                                                            |

Table S3. True variables, codes, and their BBD levels.

| Code | Variables   | -1   | 0     | +1  |
|------|-------------|------|-------|-----|
| A    | pH          | 1    | 4     | 7   |
| B    | Dose (g)    | 0.08 | 10.04 | 20  |
| C    | Time (min.) | 5    | 55.5  | 100 |

Table S4. Crystallographic data of NH<sub>2</sub>-Ag-MOF.

| <i>hkl</i> | 2 $\theta$ Observed | 2 $\theta$ Calculated | Difference |
|------------|---------------------|-----------------------|------------|
| -1 0 0     | 8.4161              | 8.3236                | 0.0925     |
| 1 -1 0     | 9.4557              | 9.4655                | -0.0098    |
| -1 0 1     | 10.2851             | 10.1803               | 0.1048     |
| 1 -1 1     | 13.8436             | 13.7447               | 0.0989     |
| -2 0 1     | 14.8678             | 14.7811               | 0.0867     |
| -1 1 1     | 15.8639             | 15.7445               | 0.1194     |
| 1 -2 1     | 16.2822             | 16.185                | 0.0972     |
| 1 -2 0     | 16.819              | 16.9235               | -0.1045    |
| -2 1 1     | 17.2102             | 17.185                | 0.0252     |
| -2 -1 0    | 22.4098             | 22.4649               | -0.0551    |
| -3 0 2     | 24.1853             | 24.0962               | 0.0891     |
| -1 -3 2    | 25.5075             | 25.5947               | -0.0872    |
| -1 -2 3    | 26.5019             | 26.4196               | 0.0823     |
| 2 -2 2     | 27.7776             | 27.6924               | 0.0852     |
| 0 -3 3     | 29.0765             | 29.1508               | -0.0743    |
| 2 -1 2     | 29.8911             | 29.8265               | 0.0646     |
| 2 1 1      | 30.9764             | 30.9681               | 0.0083     |
| 1 2 1      | 32.2876             | 32.3602               | -0.0726    |
| -4 0 0     | 33.7139             | 33.7509               | -0.037     |
| 3 2 0      | 37.7073             | 37.7547               | -0.0474    |
| 2 2 1      | 38.8598             | 38.8857               | -0.0259    |

---

|         |         |         |         |
|---------|---------|---------|---------|
| -4 3 2  | 40.6502 | 40.6763 | -0.0261 |
| -3 2 3  | 41.0262 | 41.0388 | -0.0126 |
| -2 -4 1 | 41.7318 | 41.6669 | 0.0649  |
| 2 -6 2  | 46.2829 | 46.2874 | -0.0045 |
| -4 3 3  | 48.5596 | 48.5458 | 0.0138  |
| 1 -6 1  | 49.4894 | 49.4368 | 0.0526  |
| -6 4 2  | 53.3868 | 53.352  | 0.0348  |
| 2 -7 2  | 54.8492 | 54.8362 | 0.013   |

---

Table S5. Equations used in this work to fit the data of adsorption experiments.

| Serial | Equation                                                                                                                           | Name                       | Description                                                                                                                                                                                                                                                                                                                                                                                                                                                                                                                                                                                                                                                                       | Ref. |
|--------|------------------------------------------------------------------------------------------------------------------------------------|----------------------------|-----------------------------------------------------------------------------------------------------------------------------------------------------------------------------------------------------------------------------------------------------------------------------------------------------------------------------------------------------------------------------------------------------------------------------------------------------------------------------------------------------------------------------------------------------------------------------------------------------------------------------------------------------------------------------------|------|
| 1      | $q_e = \frac{q_m}{1 + K_L C_e}$                                                                                                    | Langmuir                   | <p><math>q_e</math> (mg/g) Adsorption capacity, <math>C_e</math> equilibrium concentration, <math>q_m</math> (mg/g) is the monolayer saturation capacity constant and <math>K_L</math> (L/mg) is the Langmuir constant associated with the free adsorption energy.</p> <p>The favorability of the adsorption process in the Langmuir model is determined by means of the <math>R_L</math> dimensionless factor (<math>R_L = 1/(1 + k_L \cdot C_0)</math>) as follows: <math>R_L = 0</math>, <math>0 &lt; R_L &lt; 1</math>, <math>R_L = 1</math>, and <math>R_L &gt; 1</math> indicating irreversible, favorable, linear, and unfavorable adsorption isotherms, respectively.</p> | [1]  |
| 2      | $q_e = K_F C_e^n$                                                                                                                  | Freundlich                 | <p><math>K_F</math> Freundlich isotherm constants [(mg/g)/(mg/L)<sup>1/n</sup>], and <math>1/n</math> represents the exponent of non-linearity (i.e., C-type, L-type, and S-type isotherms). <math>n</math> is the Freundlich constants, and <math>n &lt; 1</math> indicates poor adsorption while <math>n = 1-2</math> and <math>n = 2-10</math> indicate average and good adsorptions, respectively. The values of <math>n</math> and <math>k_f</math> are calculated, respectively</p>                                                                                                                                                                                         | [2]  |
| 3      | $q_e = q_m \exp(-\beta \varepsilon^2)$ $\varepsilon = RT \ln \left( 1 + \frac{1}{C_e} \right)$ $E_{DR} = \sqrt{\frac{1}{2K_{DR}}}$ | Dubinin–Radushkevich       | <p><math>q_D</math> is the maximum monolayer adsorption capacity (mg/g), <math>B_D</math> is the activity coefficient related to the apparent free energy of adsorbate adsorption onto the adsorbent (mol<sup>2</sup>/kJ<sup>2</sup>), <math>\varepsilon_D</math> is the Polanyi potential which is related to the equilibrium concentration, and <math>E</math> is the mean adsorption energy.</p>                                                                                                                                                                                                                                                                               | [3]  |
| 4      | $q_e = Q_{max} \frac{RT}{b \ln(K_T C_e)}$                                                                                          | Temkin                     | <p><math>K_T</math> is the Temkin isotherm constant or equilibrium binding constant (L/mg) corresponding to the maximum binding energy, and <math>b_T</math> is the Temkin isotherm constant related to the heat of adsorbate adsorption onto the adsorbent due to adsorbent-adsorbate interaction (J/mol), <math>R</math> is the gas constant (8.314 J/mol.K), and <math>T</math> is the absolute temperature (herein 298 K).</p>                                                                                                                                                                                                                                                | [4]  |
| 5      | $q_t = q_e (1 - e^{-k_1 t})$                                                                                                       | Pseudo-First-order kinetic | <p><math>q_e</math> and <math>q_t</math> are the adsorption capacities at equilibrium and time <math>t</math> (mg/g), and <math>k_1</math></p>                                                                                                                                                                                                                                                                                                                                                                                                                                                                                                                                    | [5]  |

|    |                                                                  |                             |                                                                                                                                                                                                                                                                                                 |      |
|----|------------------------------------------------------------------|-----------------------------|-------------------------------------------------------------------------------------------------------------------------------------------------------------------------------------------------------------------------------------------------------------------------------------------------|------|
|    |                                                                  |                             | is the rate constant ( $\text{min}^{-1}$ ), respectively.                                                                                                                                                                                                                                       |      |
| 6  | $q_t = \frac{tK_2q_e^2}{1 + q_eK_2t}$                            | Pseudo-Second-order kinetic | $k_2$ is the pseudo-second order constant ( $\text{mg}/(\text{g}\cdot\text{min})$ )                                                                                                                                                                                                             | [6]  |
| 7  | $q_t = K_i t^{1/2} + X$                                          | Intraparticle diffusion     | $q_t$ is the adsorption capacity at time $t$ in ( $\text{mg}/\text{g}$ ), $k_{\text{int}}$ is the intraparticle diffusion rate constant ( $\text{mg}\cdot\text{g}^{-1}\cdot\text{min}^{-1/2}$ ), and $C$ is a constant related to the thickness of the boundary layer ( $\text{mg}/\text{g}$ ). | [7]  |
| 8  | $q_t = \frac{1}{\beta} \ln(\alpha\beta t + 1)$                   | Elovich                     | The constants $\alpha$ chemical adsorption rate ( $\text{mg}\cdot\text{g}^{-1}\cdot\text{min}^{-1}$ ), and $\beta$ Coefficient in relation with extension of covered surface                                                                                                                    | [8]  |
| 9  | $\Delta G^\circ = \Delta H^\circ - T\Delta S^\circ$              | Gibbs free energy           | $\Delta G^\circ$ : Gibbs free energy change; $K_d$ : equilibrium constant; $R$ : gas constant; $T$ : temperature.                                                                                                                                                                               | [9]  |
| 10 | $\ln K_d = \frac{\Delta S^\circ}{R} - \frac{\Delta H^\circ}{RT}$ | Van't Hoff                  | $\Delta S^\circ$ : entropy change; $\Delta H^\circ$ : enthalpy change.                                                                                                                                                                                                                          | [10] |
| 11 | $\ln K_d = \ln A - \left(\frac{E_a}{R}\right) \frac{1}{T}$       | Arrhenius                   | $E_a$ was the activation energy, $A$ Arrhenius constant, $R$ ideal gas constant $8.314 \text{ J/mol}\cdot\text{K}$ , $T$ (K) is the absolute solution temperature                                                                                                                               | [11] |
| 12 | $K_d = \frac{q_e}{C_e}$                                          | Selective adsorption        | The distribution coefficient ( $K_d$ ), $q_e$ adsorption capacity, $C_e$ concentration at equilibrium                                                                                                                                                                                           | [12] |
| 13 | $K_{Hg} = \frac{K_d(Hg)}{K_d(\text{ions})}$                      | Selective adsorption        | Where $K_{\text{Hg}}$ and $K_{\text{ions}}$ represent the distribution coefficients of $\text{Hg}(\text{II})$ and coexisting interfering ions, respectively.                                                                                                                                    | [13] |
| 14 | $K_{\text{ions}} = \frac{K_d(\text{ions})}{K_d(Hg)}$             | Selective adsorption        | Where $K_{\text{Hg}}$ and $K_{\text{ions}}$ represent the distribution coefficients of $\text{Hg}(\text{II})$ and coexisting interfering ions, respectively.                                                                                                                                    | [14] |

---

15

$$\alpha_d = \frac{K_{Hg}}{K_{ions}}$$

Selectivity coefficient (K) and relative selectivity coefficient ( $\alpha_d$ ) [15]

---

Table S6. The parameter of the adsorption isotherm for Hg(II) on NH<sub>2</sub>-Ag-MOF.

| <b>Isotherm</b>      | <b>Value of parameters</b>                    |             |
|----------------------|-----------------------------------------------|-------------|
| Langmuir             | $q_{m \text{ exp}}$ (mg/g)                    | 636.27      |
|                      | $q_m$ (mg/g)                                  | 638.2       |
|                      | $K_L$ (L/mg)                                  | 0.0207      |
|                      | $R_L$                                         | 0.48        |
|                      | Reduced Chi-Sqr                               | 32.56689    |
|                      | Residual Sum of Squares                       | 521.07021   |
|                      | R-Square (COD)                                | 0.9992      |
|                      | Adj. R-Square                                 | 0.99915     |
|                      | $R^2$                                         | 0.999       |
| Freundlich           | n                                             | 2.72        |
|                      | $K_F$ (mg/g) (L/mg) <sup>1/n</sup>            | 83.7        |
|                      | Reduced Chi-Sqr                               | 1172.37108  |
|                      | Residual Sum of Squares                       | 18757.93724 |
|                      | R-Square (COD)                                | 0.97114     |
|                      | Adj. R-Square                                 | 0.96933     |
|                      | $R^2$                                         | 0.968       |
| Dubinin–Radushkevich | $Q_{DR}$ (mg.g <sup>-1</sup> )                | 578.88      |
|                      | $K_{DR}$ (mol <sup>2</sup> /kJ <sup>2</sup> ) | 1.04E-4     |
|                      | Ea (kJ/mol)                                   | 31.6        |
|                      | Reduced Chi-Sqr                               | 3603.44831  |
|                      | Residual Sum of Squares                       | 57655.17294 |
|                      | R-Square (COD)                                | 0.91129     |
|                      | Adj. R-Square                                 | 0.90574     |
|                      | $R^2$                                         | 0.906       |
| Temkin               | $b_T$ (J/mol)                                 | 15.84       |
|                      | $K_T$ (L/mol)                                 | 0.22        |
|                      | Reduced Chi-Sqr                               | 163.68444   |
|                      | Residual Sum of Squares                       | 2618.9511   |
|                      | R-Square (COD)                                | 0.99597     |

|         |                         |           |
|---------|-------------------------|-----------|
|         | Adj. R-Square           | 0.99572   |
|         | R <sup>2</sup>          | 0.996     |
| Jossens | K                       | 15.38     |
|         | J                       | 0.022     |
|         | Reduced Chi-Sqr         | 34.3751   |
|         | Residual Sum of Squares | 515.62646 |
|         | R-Square (COD)          | 0.99921   |
|         | Adj. R-Square           | 0.9991    |
|         | R <sup>2</sup>          | 0.999     |

Table S7. Models of adsorption kinetic parameters of Hg(II) on NH<sub>2</sub>@Ag-MOF

| Model                       | Value of parameters                                            |              |
|-----------------------------|----------------------------------------------------------------|--------------|
| Pseudo-First-order kinetic  | $K_1$ (min <sup>-1</sup> )x10 <sup>-2</sup>                    | 0.0915       |
|                             | Reduced Chi-Sqr                                                | 2117.82712   |
|                             | Residual Sum of Squares                                        | 38120.88815  |
|                             | R-Square (COD)                                                 | 0.94657      |
|                             | Adj. R-Square                                                  | 0.9436       |
|                             | R <sup>2</sup>                                                 | 0.944        |
| Pseudo-second-order kinetic | $K_2$ (g.mg <sup>-1</sup> min <sup>-1</sup> )x10 <sup>-2</sup> | 1.66E-4      |
|                             | q <sub>e</sub> (mg/g)                                          | 636.8        |
|                             | Reduced Chi-Sqr                                                | 2321.08931   |
|                             | Residual Sum of Squares                                        | 41779.6076   |
|                             | R-Square (COD)                                                 | 0.94144      |
|                             | Adj. R-Square                                                  | 0.93818      |
|                             | R <sup>2</sup>                                                 | 0.937        |
| Intraparticle diffusion     | $K_i$ (mg.g <sup>-1</sup> min <sup>1/2</sup> )                 | 81.93        |
|                             | X (mg/g)                                                       | 29.11        |
|                             | Reduced Chi-Sqr                                                | 12906.64351  |
|                             | Residual Sum of Squares                                        | 245226.22668 |
|                             | R-Square (COD)                                                 | 0.65627      |

|                   |                                                  |             |
|-------------------|--------------------------------------------------|-------------|
|                   | Adj. R-Square                                    | 0.65627     |
|                   | R <sup>2</sup>                                   | 0.655       |
| Elovich           | $\beta$ (g/mg)                                   | 139.58      |
|                   | $\alpha$ (mg.g <sup>-1</sup> min <sup>-1</sup> ) | 0.01        |
|                   | Reduced Chi-Sqr                                  | 3485.1365   |
|                   | Residual Sum of Squares                          | 62732.45698 |
|                   | R-Square (COD)                                   | 0.91207     |
|                   | Adj. R-Square                                    | 0.90718     |
|                   | R <sup>2</sup>                                   | 0.906       |
| Experimental data | q <sub>e</sub> (exp) (mmol/g)                    | 635.7       |

Table S8. The thermodynamic parameters.

| T (K) | $\Delta G$ (kJ/mol) | $\Delta H$ (kJ/mol.K) | $\Delta S$ (J/mol.K) |
|-------|---------------------|-----------------------|----------------------|
| 293   | -0.4211             |                       |                      |
| 298   | -1.87813            | 84.9                  | 291.4                |
| 303   | -3.33516            |                       |                      |
| 308   | -4.79219            |                       |                      |
| 313   | -6.24922            |                       |                      |
| 318   | -7.70625            |                       |                      |

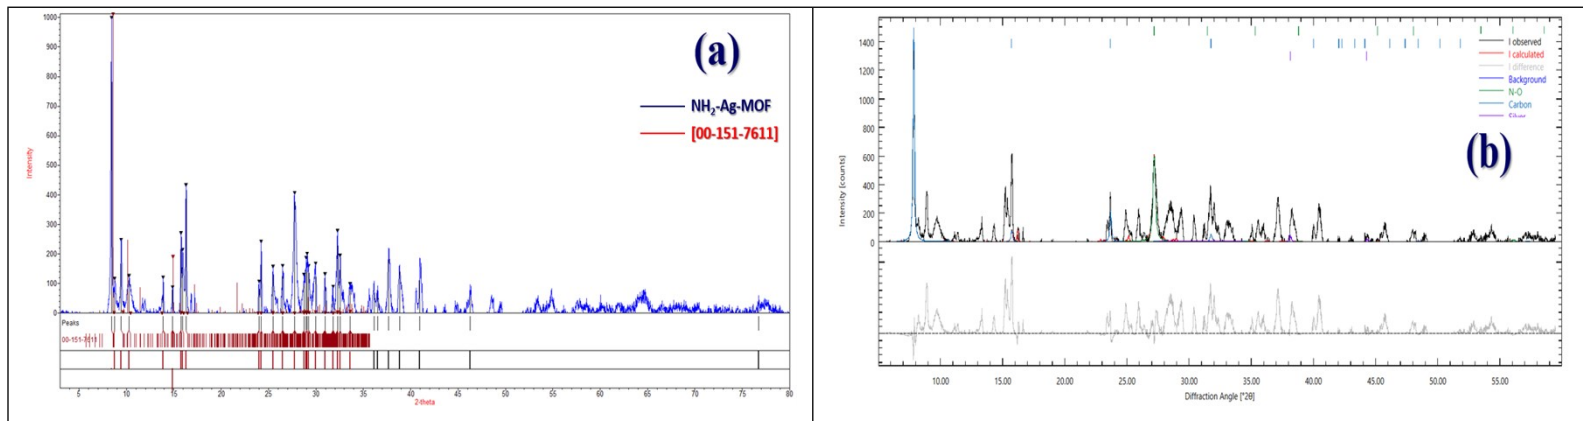

Fig. S1. (a) XRD pattern of NH<sub>2</sub>-Ag-MOF with phase identification using QualX software, (b) Rietveld-Fitted X-ray Diffraction Pattern of NH<sub>2</sub>-Ag-MOF Using Profex.

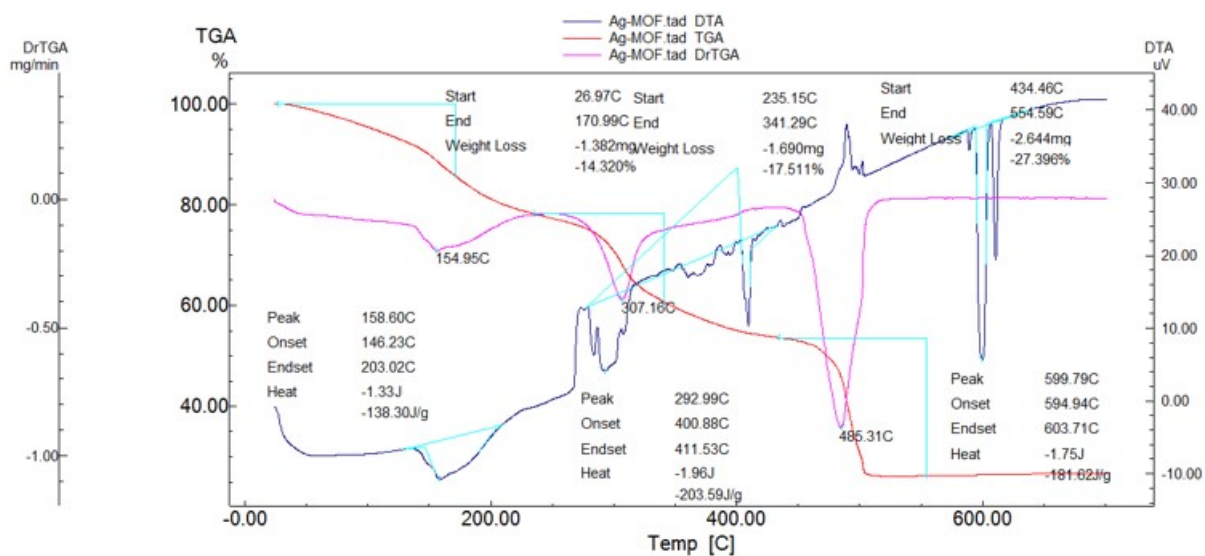

Fig. S2. TGA of NH<sub>2</sub>-Ag-MOF.

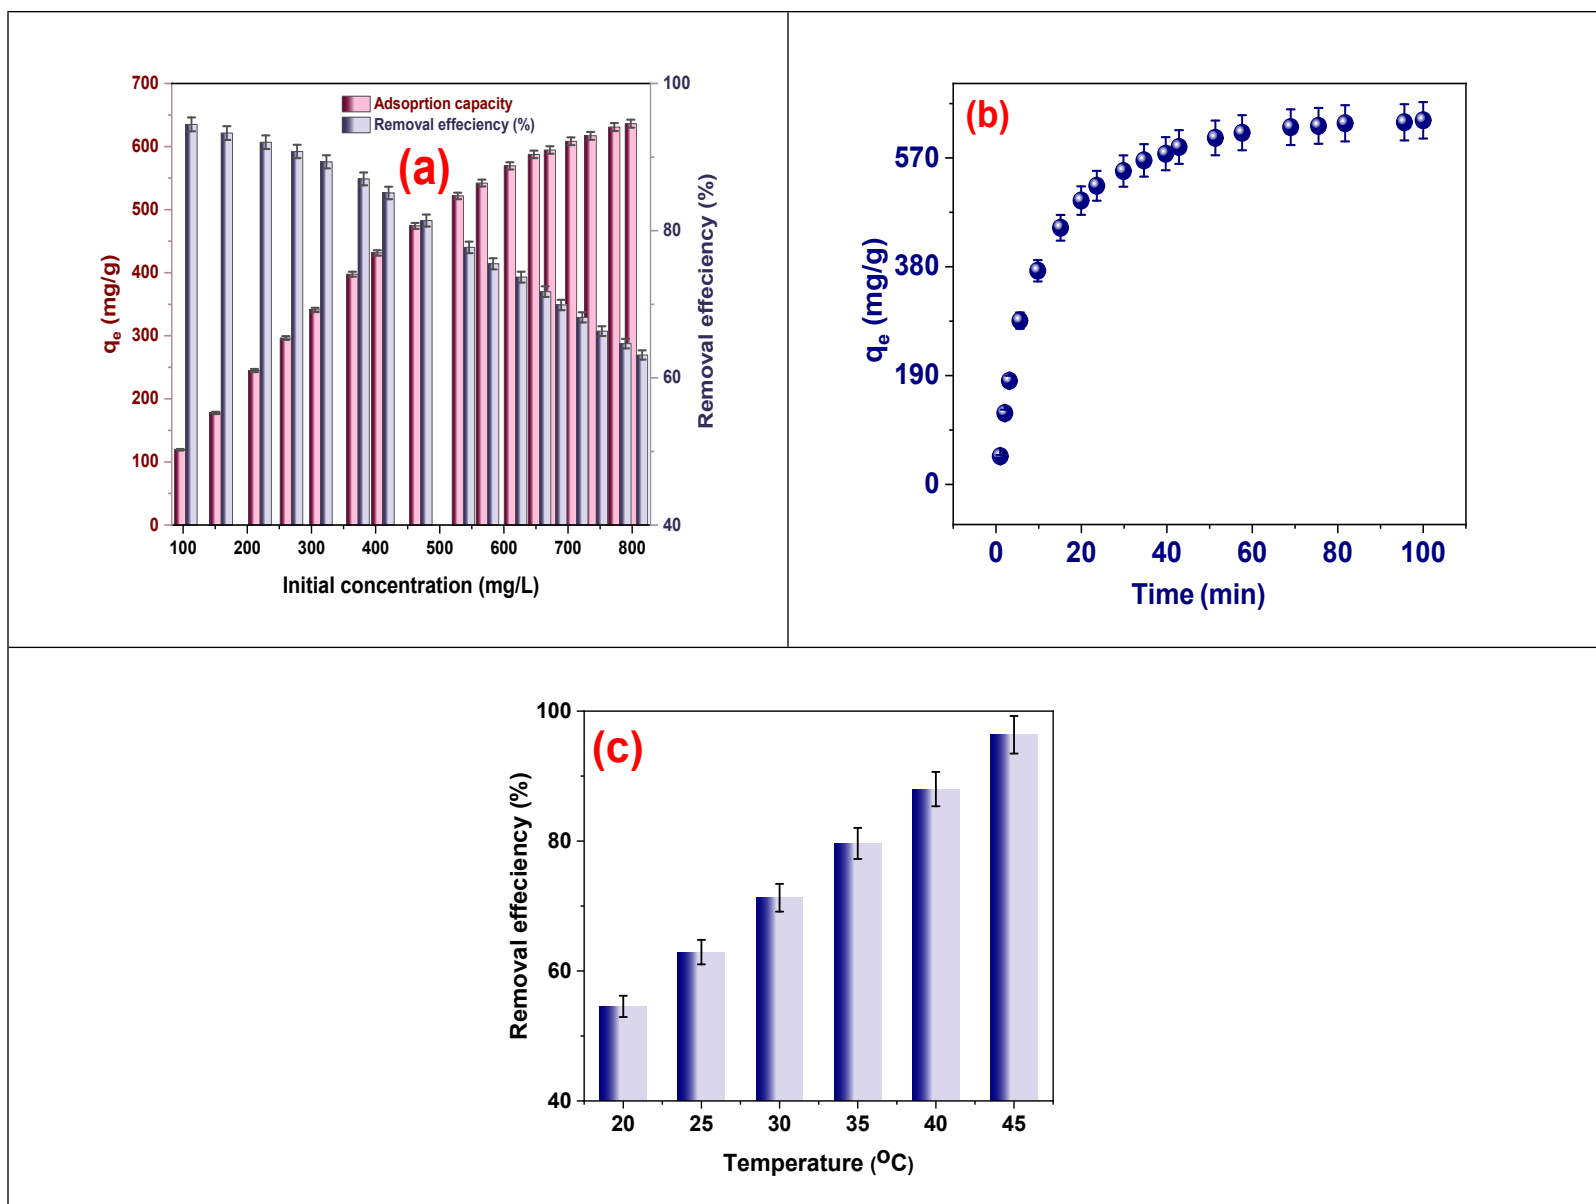

Fig. S3. (a) Effect of initial concentration (pH: 4,  $C_i$ : 104 to 806 mg/L, dose: 0.02 g, contact time: 100 min., volume 25 mL, temperature 25 °C), (b) Effect of contact time (pH: 4,  $C_i$ : 500 mg/L, dose: 0.02 g, contact time: 100 min., volume 25 mL, temperature 25 °C), and (c) Effect of temperature (pH: 4,  $C_i$ : 600 mg/L, dose: 0.02 to 0.50 g, contact time: 30 min., volume 25 mL, temperature 25 °C) on adsorption of Hg(II) ions on NH<sub>2</sub>-Ag-MOF.

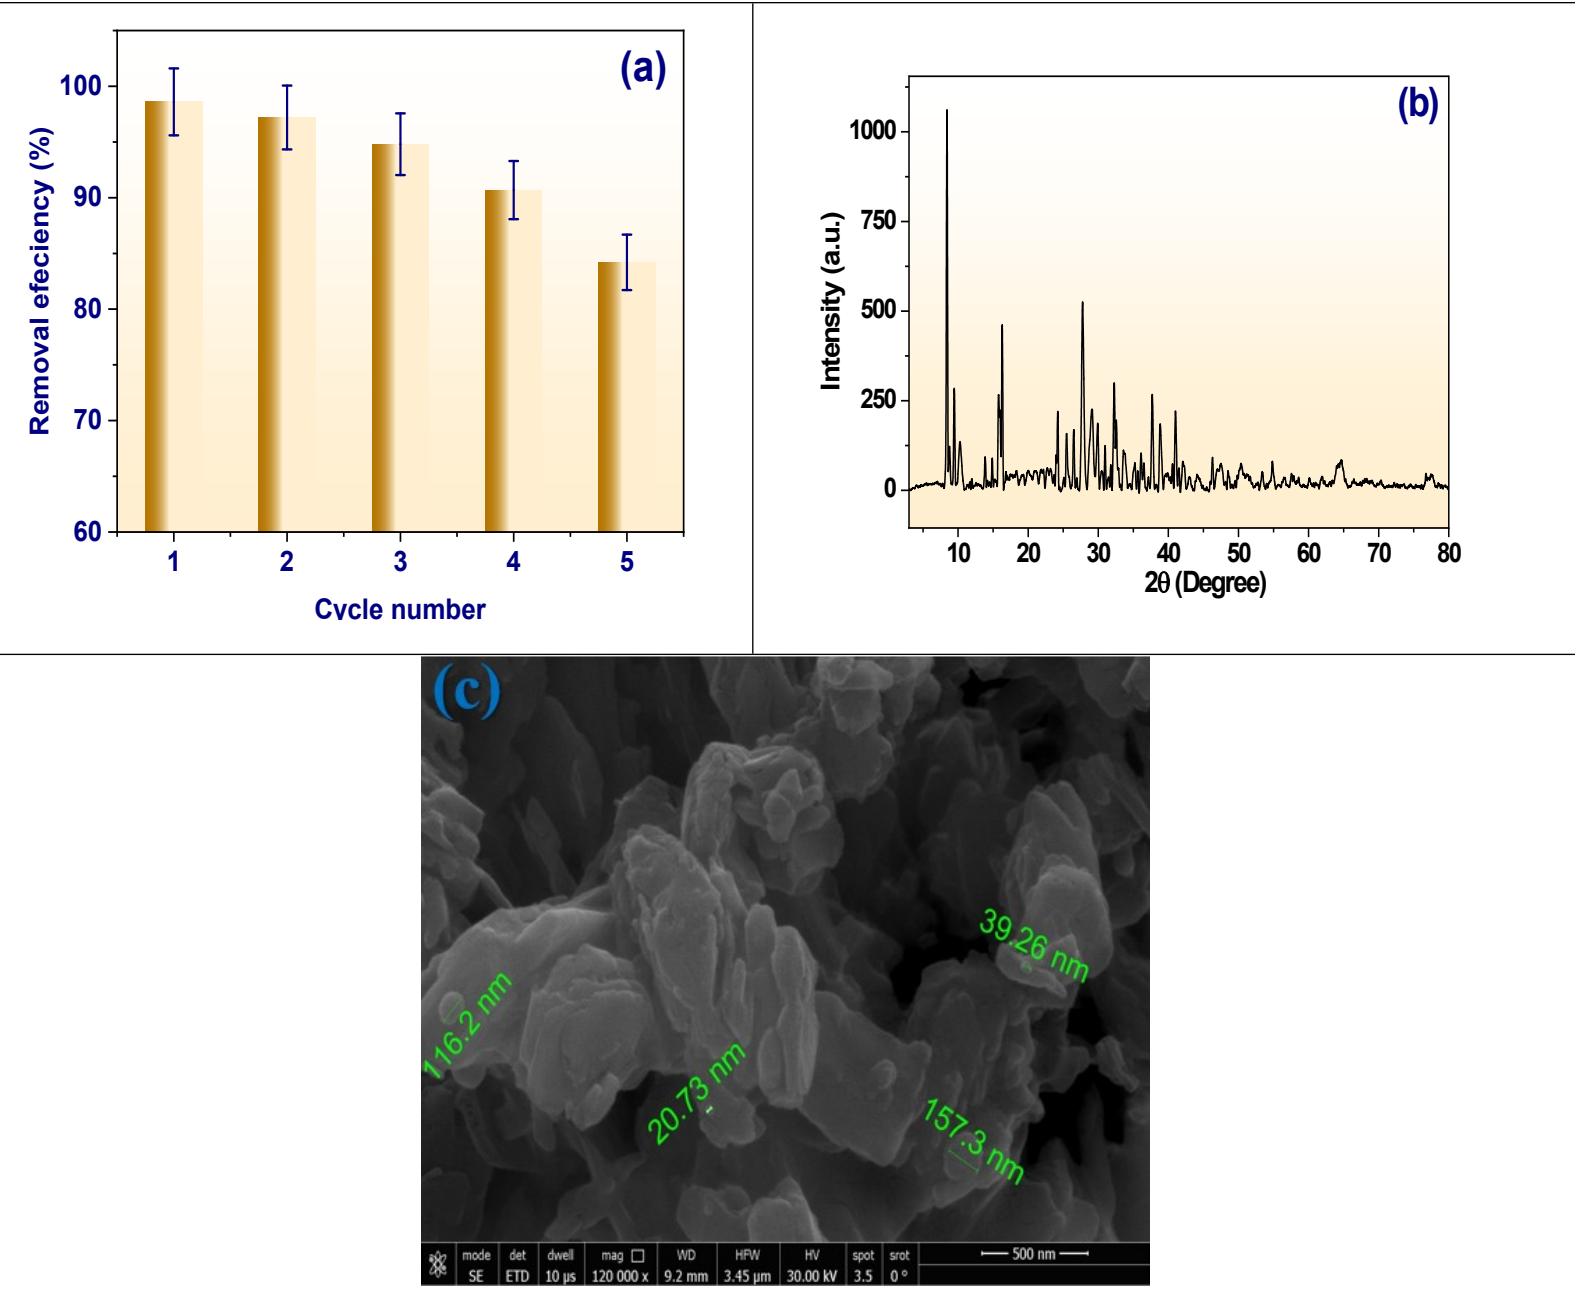

Fig. S4. (a) Regeneration efficiency of NH<sub>2</sub>-Ag-MOF, (b) XRD of regneratyed NH<sub>2</sub>-Ag-MOF, and (c) SEM of regneratyed NH<sub>2</sub>-Ag-MOF.

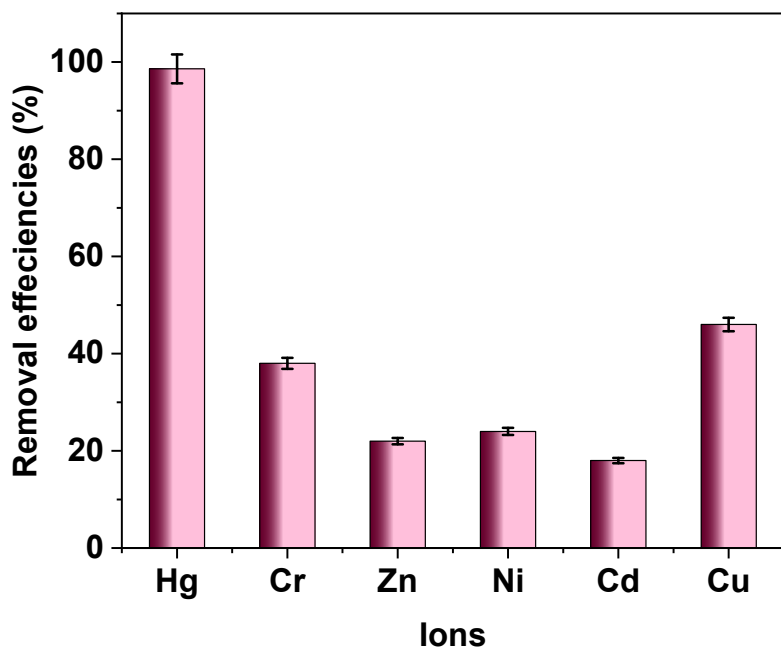

Fig. S5. Consequences of removing Hg(II) from an actual water sample.

## References

- [1] I. Langmuir, The constitution and fundamental properties of solids and liquids. Part I. Solids, *J. Am. Chem. Soc.*, 38 (1916) 2221-2295.
- [2] H.M.F. Freundlich, Over the adsorption in solution, *J. Phys. Chem.*, 57 (1906) 385-471.
- [3] M. Dubinin, The equation of the characteristic curve of activated charcoal, *Proc. Acad. Sci. USSR Phys. Chem. Sect.*, 55 (1947) 327-329.
- [4] V.P. M.I. Tempkin, Kinetics of ammonia synthesis on promoted iron catalyst, *Acta Phys. Chim. USSR*, 12 (1940) 327-356.
- [5] S.K. Lagergren, About the theory of so-called adsorption of soluble substances, *Sven. Vetenskapsakad. Handlingar*, 24 (1898) 1-39.
- [6] Y.-S. Ho, G. McKay, Sorption of dye from aqueous solution by peat, *Chemical engineering journal*, 70 (1998) 115-124.
- [7] W.J. Weber Jr, J.C. Morris, Kinetics of adsorption on carbon from solution, *J. Sanit. Eng. Div.*, 89 (1963) 31-59.
- [8] M.H. Dehghani, A. Dehghan, A. Najafpoor, Removing Reactive Red 120 and 196 using chitosan/zeolite composite from aqueous solutions: Kinetics, isotherms, and process optimization, *Journal of Industrial and Engineering Chemistry*, 51 (2017) 185-195.
- [9] E.C. Lima, A. Hosseini-Bandegharai, J.C. Moreno-Piraján, I. Anastopoulos, A critical review of the estimation of the thermodynamic parameters on adsorption equilibria. Wrong use of equilibrium constant in the Van't Hoof equation for calculation of thermodynamic parameters of adsorption, *Journal of molecular liquids*, 273 (2019) 425-434.

- [10] H.N. Tran, S.-J. You, A. Hosseini-Bandegharai, H.-P. Chao, Mistakes and inconsistencies regarding adsorption of contaminants from aqueous solutions: a critical review, *Water research*, 120 (2017) 88-116.
- [11] B. Oladipo, E. Govender-Opitz, T.V. Ojumu, Kinetics, thermodynamics, and mechanism of Cu(II) ion sorption by biogenic iron precipitate: using the lens of wastewater treatment to diagnose a typical biohydrometallurgical problem, *ACS Omega*, 6 (2021) 27984-27993.
- [12] L. Fu, S. Wang, G. Lin, L. Zhang, Q. Liu, J. Fang, C. Wei, G. Liu, Post-functionalization of UiO-66-NH<sub>2</sub> by 2, 5-Dimercapto-1, 3, 4-thiadiazole for the high efficient removal of Hg (II) in water, *Journal of hazardous materials*, 368 (2019) 42-51.
- [13] X. Liu, J. Tang, L. Fu, H. Wang, S. Wang, C. Xiong, S. Wang, L. Zhang, Ligand design of a novel metal-organic framework for selective capturing of Pb(II) from wastewater, *Journal of Cleaner Production*, 386 (2023) 135841.
- [14] M. Zhu, X. Liu, D. Xiang, Y. Chen, S. Wang, R. Zhu, D. Zhang, Z. Peng, L. Fu, The design of high-efficient MOFs for selective Ag(I) capture: DFT calculations and practical applications, *Journal of Hazardous Materials*, 476 (2024) 135204.
- [15] D. Xiang, Y. Chen, M. Zhu, S. Wang, R. Zhu, J. Luo, Y. Wu, L. Fu, Y. Zuo, Efficient capture of lead ions from aqueous solution by the functional covalent organic framework materials, *Journal of Molecular Structure*, 1312 (2024) 138674.
- [16] K. Chen, Z. Zhang, K. Xia, X. Zhou, Y. Guo, T. Huang, Facile synthesis of thiol-functionalized magnetic activated carbon and application for the removal of mercury (II) from aqueous solution, *J ACS Omega*, 4 (2019) 8568-8579.
- [17] Y. Shen, N. Jiang, S. Liu, C. Zheng, X. Wang, T. Huang, Y. Guo, R. Bai, Thiol functionalization of short channel SBA-15 through a safe, mild and facile method and application for the removal of mercury (II), *Journal of environmental chemical engineering*, 6 (2018) 5420-5433.
- [18] H. Shirzadi, A. Nezamzadeh-Ejehieh, An efficient modified zeolite for simultaneous removal of Pb(II) and Hg(II) from aqueous solution, *Journal of Molecular Liquids*, 230 (2017) 221-229.
- [19] A. Saad, I. Bakas, J.-Y. Piquemal, S. Nowak, M. Abderrabba, M.M. Chehimi, Mesoporous silica/polyacrylamide composite: preparation by UV-graft photopolymerization, characterization and use as Hg(II) adsorbent, *J Applied Surface Science*, 367 (2016) 181-189.
- [20] Y. Fu, Y. Huang, J. Hu, Preparation of chitosan/MCM-41-PAA nanocomposites and the adsorption behaviour of Hg(II) ions, *J Royal Society Open Science*, 5 (2018) 171927.
- [21] H. Wei, H. Wang, Y. Xia, D. Cui, Y. Shi, M. Dong, C. Liu, T. Ding, J. Zhang, Y. Ma, An overview of lead-free piezoelectric materials and devices, *Journal of Materials Chemistry C*, 6 (2018) 12446-12467.
- [22] M. Shafiabadi, A. Dashti, H.-A. Tayebi, Removal of Hg(II) from aqueous solution using polypyrrole/SBA-15 nanocomposite: Experimental and modeling, *J Synthetic Metals*, 212 (2016) 154-160.
- [23] B. Geng, Z. Xu, P. Liang, J. Zhang, P. Christie, H. Liu, S. Wu, X. Liu, Three-dimensional macroscopic aminosilylated nanocellulose aerogels as sustainable bio-adsorbents for the effective removal of heavy metal ions, *J International Journal of Biological Macromolecules*, 190 (2021) 170-177.
- [24] M. Naushad, T. Ahamad, G. Sharma, H. Ala'a, A.B. Albadarin, M.M. Alam, Z.A. AlOthman, S.M. Alshehri, A.A.J.C.E.J. Ghfar, Synthesis and characterization of a new starch/SnO<sub>2</sub> nanocomposite for efficient adsorption of toxic Hg<sup>2+</sup> metal ion, 300 (2016) 306-316.
